# Supplementary material
Source: ML conference proceedings conference paper supplement (https://openreview.net/forum?id=LKUVlhjgOw)

Reward and PF Rate with filtering  $\phi(t, Y)$

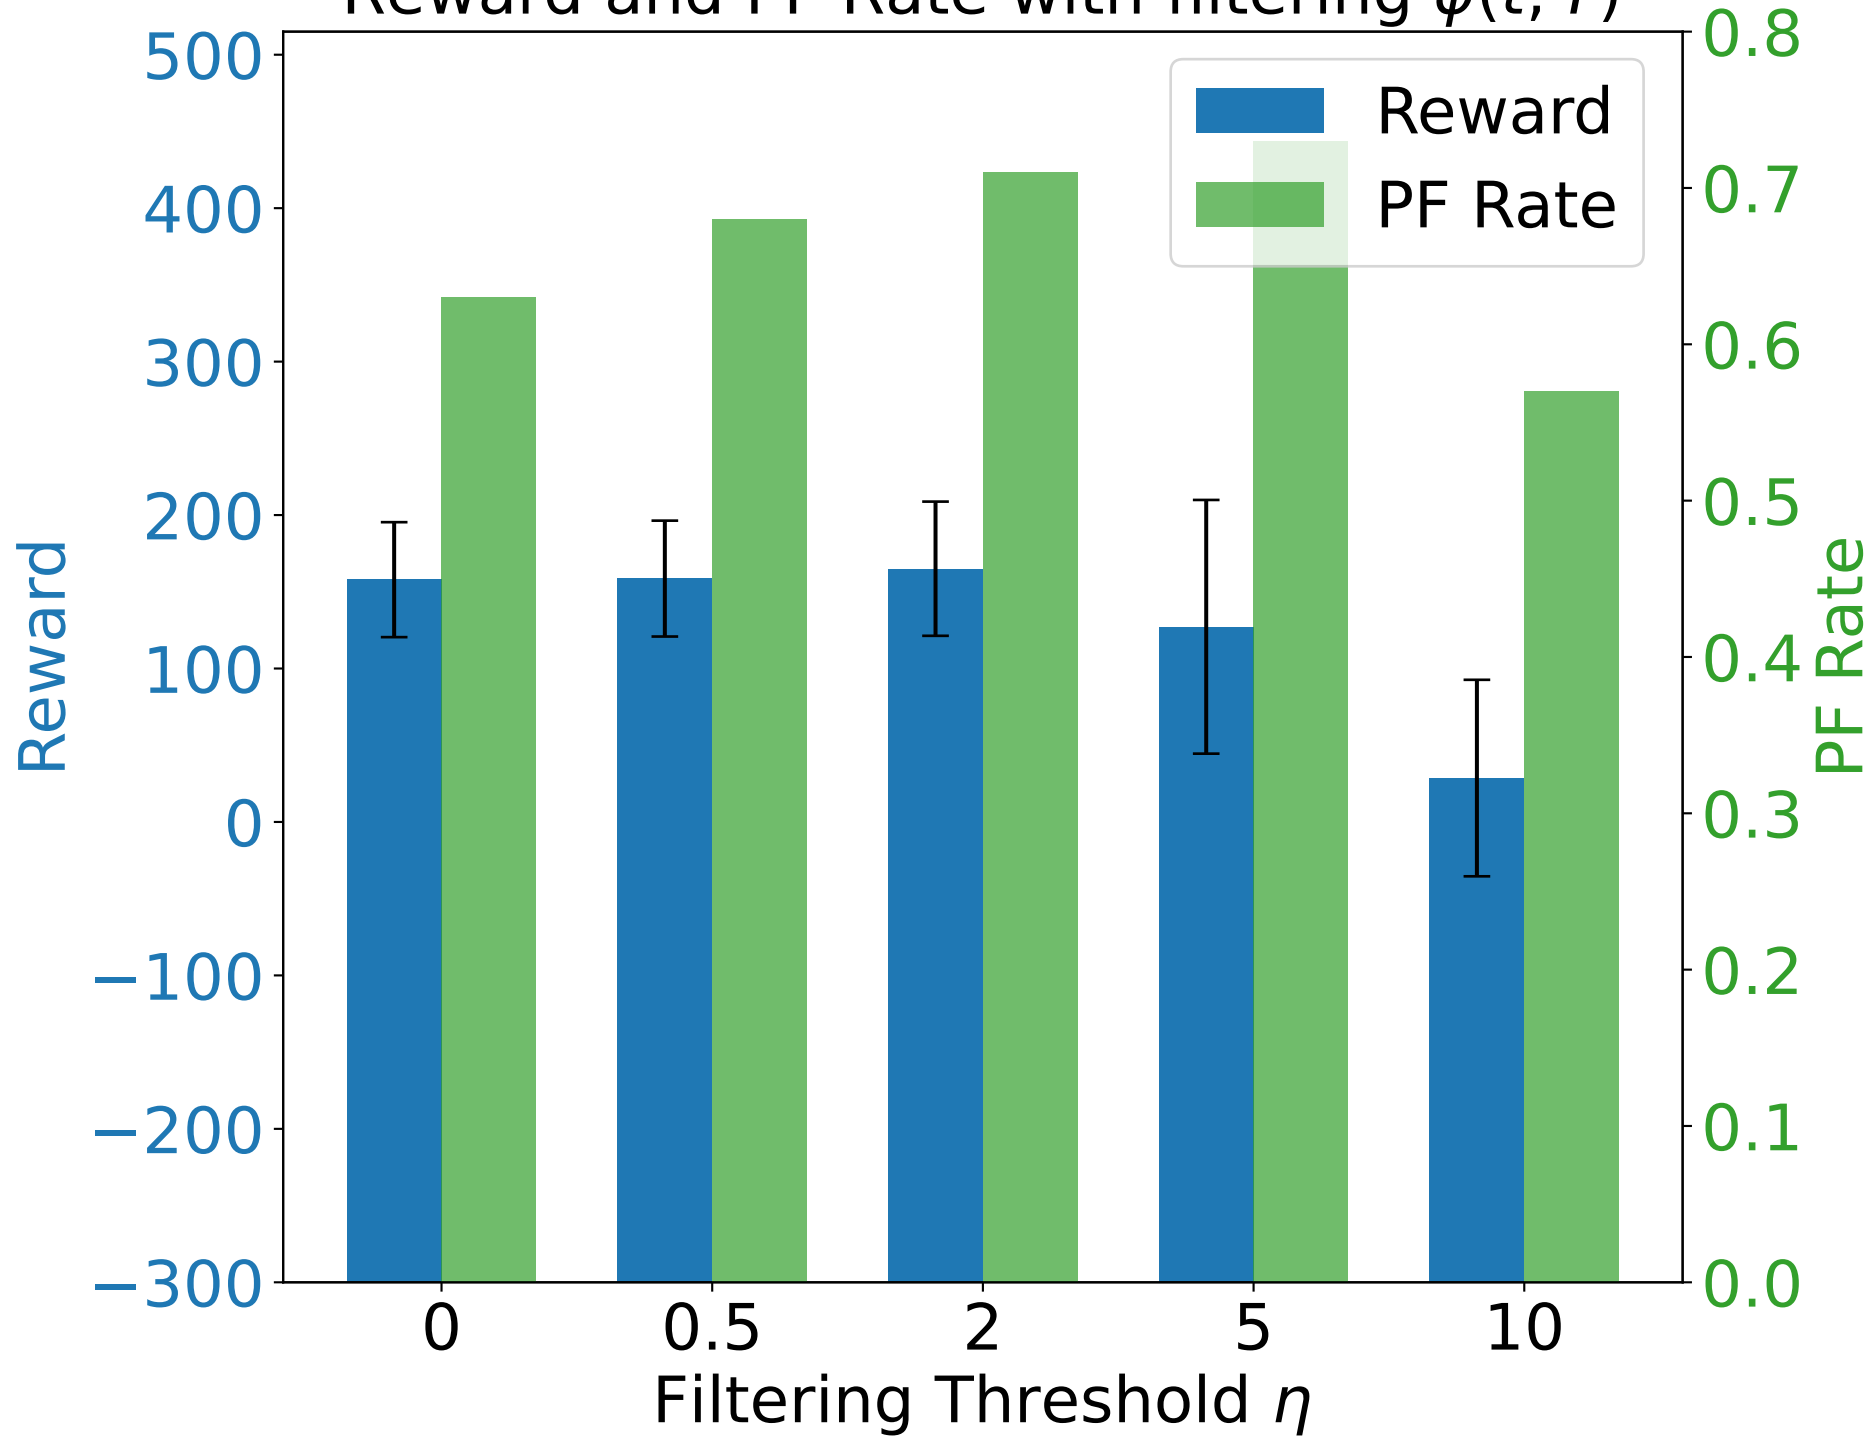

Supplement: supplementary_material [file attachment]

Reward and PF Rate with filtering  $\phi(Y)$

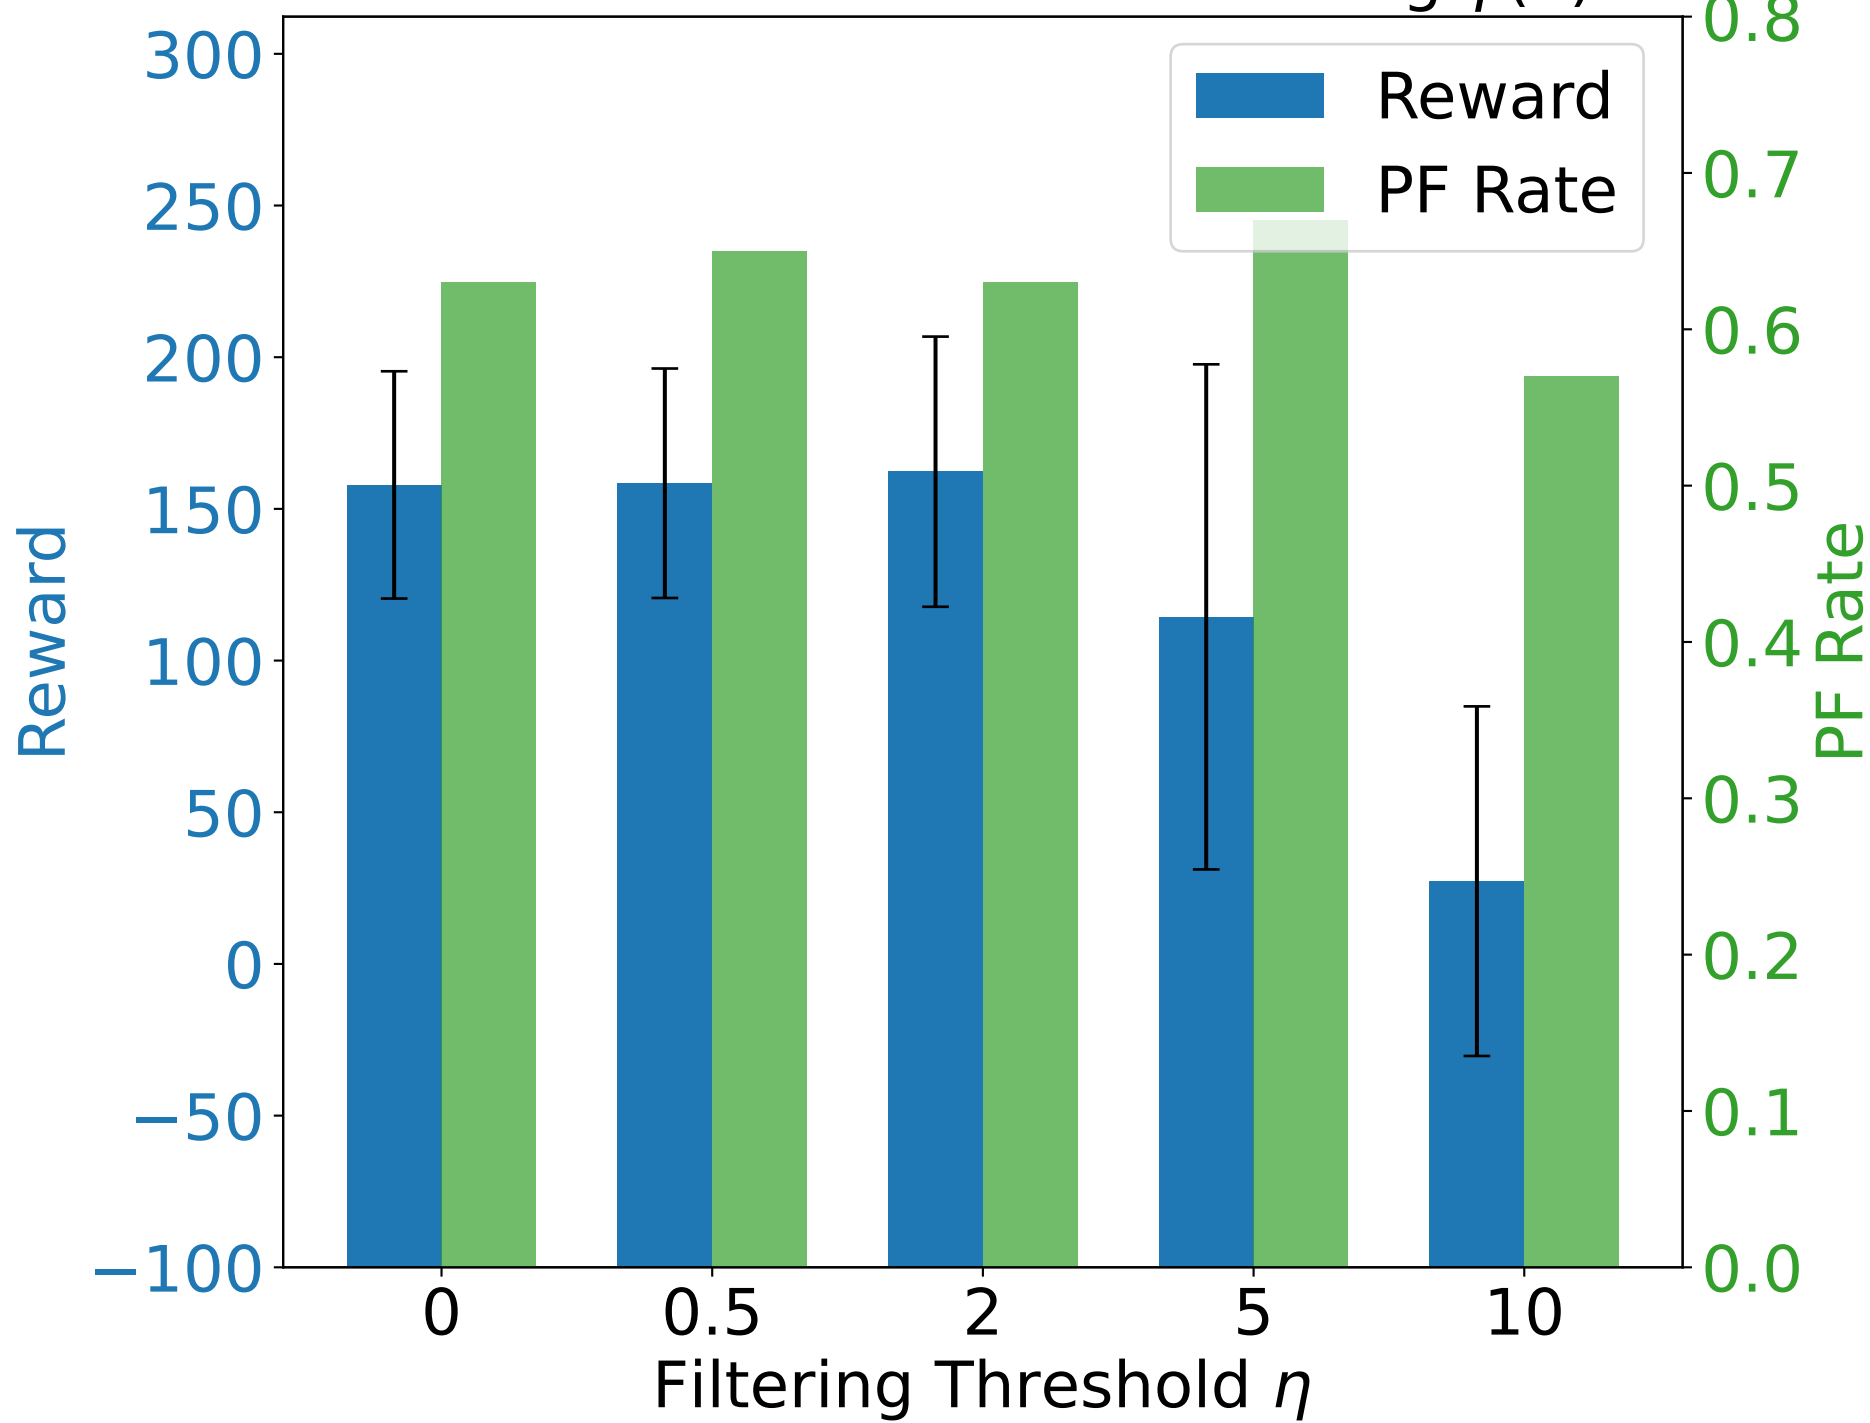

Supplement: supplementary_material [file attachment]
